# Supplementary material for: Cerebral responses to in-game failure and resting-state connectivity are jointly associated with gaming addiction
Source: Research Square preprint supplement (doi:10.21203/rs.3.rs-7044193/v1), 2025-09-19
Supplement: Supplementary file 1 [file 5f391a98b86820d5cf046bb9.docx]

**Supplementary information for
Cerebral responses to in-game failure and resting-state connectivity are jointly associated with gaming addiction**

Jonathan M. Donga, Feng-Rui Zhangb,†

aLower Canada College, Montreal, Quebec, Canada, H4A2L1

b Department of Neuroscience and Department of Psychiatry, Washington University in St. Louis, St. Louis, MO, USA, 63110

† Correspondence to Dr. Feng-Rui Zhang: zhang.ray.1026@gmail.com


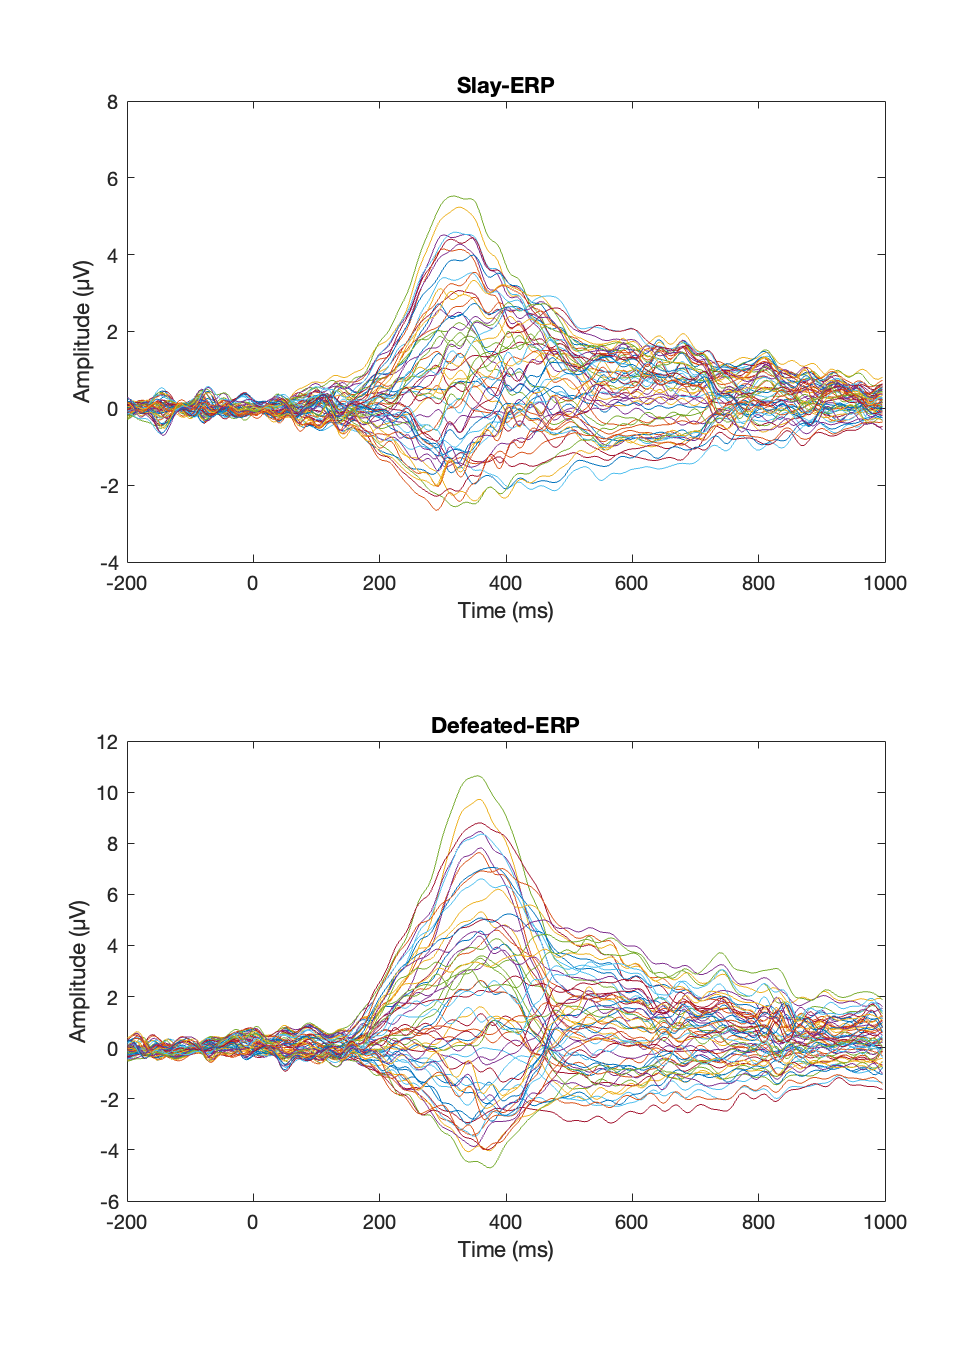


Figure S1. ERP for all channels (related to Figure 2).

Table S1 Correlation matrix for gaming hours and IGD-20.

|  | IGD-20 total | Salience | Mood modification |
| --- | --- | --- | --- |
| Weekly gaming duration (hour) | r = 0.109  p = 0.620 | r = 0.133  p = 0.546 | r = 0.164  p = 0.454 |

|  | Withdrawal symptoms | Tolerance | Conflict | Relapse |
| --- | --- | --- | --- | --- |
| Weekly gaming duration (hour) | r = -0.090  p = 0.683 | r = -0.020  p = 0.926 | r = 0.028  p = 0.899 | r = 0.127  p = 0.564 |

Table S2. Correlation matrix for ERP components and gaming disorder indexes (related to Figure 3).

|  | | Gaming hours | IGD-20 total | Salience | Mood modification |
| --- | --- | --- | --- | --- | --- |
| Slay | Amplitude | r = 0.120  p = 0.585 | r = -0.035  p = 0.876 | r = -0.006  p = 0.977 | r = 0.173  p = 0.430 |
| Beta power | r = -0.121  p = 0.583 | r = 0.080  p = 0.717 | r = 0.032  p = 0.885 | r = -0.040  p = 0.856 |
| Alpha power | r = -0.134  p = 0.543 | r = 0.391  p = 0.065 | r = 0.181  p = 0.408 | r = 0.295  p = 0.172 |
| Defeated | Amplitude | r = 0.039  p = 0.860 | r = 0.276  p = 0.203 | r = -0.203  p = 0.354 | r = 0.122  p = 0.578 |
| Beta power | r = -0.115  p = 0.601 | r = 0.266  p = 0.221 | r = 0.096  p = 0.662 | r = 0.120  p = 0.585 |
| Alpha power | r = 0.245  p = 0.260 | r = 0.461  p = 0.027 | r = 0.460  p = 0.027 | r = 0.213  p = 0.330 |

|  | | Withdrawal symptoms | Tolerance | Conflict | Relapse |
| --- | --- | --- | --- | --- | --- |
| Slay | Amplitude | r = 0.068  p = 0.758 | r = -0.097  p = 0.660 | r = -0.117  p = 0.595 | r = -0.128  p = 0.559 |
| Beta power | r = 0.078  p = 0.723 | r = -0.075  p = 0.735 | r = 0.271  p = 0.211 | r = -0.020  p = 0.928 |
| Alpha power | r = 0.266  p = 0.220 | r = 0.153  p = 0.487 | r = 0.266  p = 0.220 | r = 0.275  p = 0.204 |
| Defeated | Amplitude | r = -0.053  p = 0.810 | r = -0.293  p = 0.174 | r = -0.146  p = 0.507 | r = -0.455  p = 0.029 |
| Beta power | r = 0.252  p = 0.247 | r = 0.158  p = 0.471 | r = 0.452  p = 0.030 | r = -0.069  p = 0.753 |
| Alpha power | r = 0.172  p = 0.432 | r = 0.063  p = 0.776 | r = 0.503  p = 0.014 | r = 0.227  p = 0.299 |

Table S3A. Two-way ANOVA and post hoc table for whole brain WPLI

| ANOVA table | SS | DF | MS | F (DFn, DFd) | p value |
| --- | --- | --- | --- | --- | --- |
| Interaction | 0.1922 | 4 | 0.04806 | F (4, 110) = 22.63 | <0.0001 |
| Frequency band factor | 0.6685 | 4 | 0.1671 | F (4, 110) = 30.41 | <0.0001 |
| Eyes condition factor | 0.06105 | 1 | 0.06105 | F (1, 110) = 28.74 | <0.0001 |
| Residual | 0.2337 | 110 | 0.002124 |  |  |

| Open – Closed (Bonferroni's multiple comparisons) | Mean Diff. | 95.00% CI of diff. | Adjusted p value |
| --- | --- | --- | --- |
| Delta | 0.01744 | -0.01818 to 0.05307 | >0.9999 |
| Theta | -0.005790 | -0.04142 to 0.02984 | >0.9999 |
| Alpha | -0.1393 | -0.1749 to -0.1037 | <0.0001 |
| Beta | -0.04646 | -0.08209 to -0.01084 | 0.0044 |
| Gamma | 0.01119 | -0.02444 to 0.04681 | >0.9999 |

Table S3B. Two-way ANOVA and post hoc table for clustering coefficient

| ANOVA table | SS | DF | MS | F (DFn, DFd) | p value |
| --- | --- | --- | --- | --- | --- |
| Interaction | 0.1631 | 4 | 0.04078 | F (4, 110) = 22.11 | <0.0001 |
| Frequency band factor | 0.5593 | 4 | 0.1398 | F (4, 110) = 29.90 | <0.0001 |
| Eyes condition factor | 0.05288 | 1 | 0.05288 | F (1, 110) = 28.66 | <0.0001 |
| Residual | 0.2029 | 110 | 0.001845 |  |  |

| Open – Closed (Bonferroni's multiple comparisons) | Mean Diff. | 95.00% CI of diff. | Adjusted p value |
| --- | --- | --- | --- |
| Delta | 0.01516 | -0.01804 to 0.04836 | >0.9999 |
| Theta | -0.005232 | -0.03843 to 0.02797 | >0.9999 |
| Alpha | -0.1289 | -0.1621 to -0.09572 | <0.0001 |
| Beta | -0.04254 | -0.07574 to -0.009337 | 0.0054 |
| Gamma | 0.009903 | -0.02330 to 0.04310 | >0.9999 |

Table S3C. Two-way ANOVA and post hoc table for mean path length

| ANOVA table | SS | DF | MS | F (DFn, DFd) | p value |
| --- | --- | --- | --- | --- | --- |
| Interaction | 311.0 | 4 | 77.75 | F (4, 110) = 7.541 | <0.0001 |
| Frequency band factor | 1871 | 4 | 467.7 | F (4, 110) = 19.70 | <0.0001 |
| Eyes condition factor | 50.86 | 1 | 50.86 | F (1, 110) = 4.933 | 0.0284 |
| Residual | 1134 | 110 | 10.31 |  |  |

| Open – Closed (Bonferroni's multiple comparisons) | Mean Diff. | 95.00% CI of diff. | Adjusted p value |
| --- | --- | --- | --- |
| Delta | -1.817 | -4.299 to 0.6647 | 0.2877 |
| Theta | 0.3127 | -2.169 to 2.795 | >0.9999 |
| Alpha | 3.781 | 1.299 to 6.263 | 0.0006 |
| Beta | 3.540 | 1.058 to 6.022 | 0.0015 |
| Gamma | -1.114 | -3.596 to 1.368 | >0.9999 |

Table S3D. Two-way ANOVA and post hoc table for global efficiency

| ANOVA table | SS | DF | MS | F (DFn, DFd) | p value |
| --- | --- | --- | --- | --- | --- |
| Interaction | 0.2397 | 4 | 0.05992 | F (4, 110) = 21.15 | <0.0001 |
| Frequency band factor | 0.8091 | 4 | 0.2023 | F (4, 110) = 28.84 | <0.0001 |
| Eyes condition factor | 0.06879 | 1 | 0.06879 | F (1, 110) = 24.28 | <0.0001 |
| Residual | 0.3117 | 110 | 0.002834 |  |  |

| Open – Closed (Bonferroni's multiple comparisons) | Mean Diff. | 95.00% CI of diff. | Adjusted p value |
| --- | --- | --- | --- |
| Delta | 0.02348 | -0.01767 to 0.06462 | 0.6880 |
| Theta | -0.006795 | -0.04794 to 0.03435 | >0.9999 |
| Alpha | -0.1537 | -0.1949 to -0.1126 | <0.0001 |
| Beta | -0.04919 | -0.09033 to -0.008043 | 0.0111 |
| Gamma | 0.01329 | -0.02786 to 0.05443 | >0.9999 |

Table S4A. Correlation matrix for wPLI and gaming disorder indexes (related to Figure 5).

|  | Delta-band | | Theta-band | | Alpha-band | | Beta-band | | Gamma-band | |
| --- | --- | --- | --- | --- | --- | --- | --- | --- | --- | --- |
|  | Open | Close | Open | Close | Open | Close | Open | Close | Open | Close |
| Gaming hours | r = 0.407  p = 0.054 | r = -0.044  p = 0.842 | r = -0.160  p = 0.467 | r = 0.277  p = 0.200 | r = -0.105  p = 0.633 | r = -0.028  p = 0.900 | r = -0.112  p = 0.612 | r = -0.167  p = 0.446 | r = 0.114  p = 0.606 | r = -0.179  p = 0.414 |
| IGD-20 total | r = 0.317  p = 0.140 | r = 0.575  p = 0.004 | r = 0.092  p = 0.675 | r = -0.337  p = 0.115 | r = -0.324  p = 0.132 | r = -0.068  p = 0.759 | r = -0.176  p = 0.422 | r = 0.046  p = 0.836 | r = -0.167  p = 0.446 | r = -0.102  p = 0.644 |
| Salience | r = 0.267  p = 0.218 | r = 0.178  p = 0.416 | r = 0.081  p = 0.712 | r = -0.282  p = 0.193 | r = -0.219  p = 00.315 | r = -0.040  p = 0.858 | r = -0.185  p = 0.398 | r = -0.079  p = 0.719 | r = -0.301  p = 0.163 | r = -0.298  p = 0.167 |
| Mood modification | r = 0.370  p = 0.083 | r = 0.381  p = 0.073 | r = 0.071  p = 0.748 | r = 0.072  p = 0.745 | r = -0.253  p = 0.244 | r = -0.345  p = 0.107 | r = -0.046  p = 0.835 | r = -0.015  p = 0.947 | r = 0.037  p = 0.868 | r = 0.086  p = 0.696 |
| Withdrawal symptoms | r = 0.126  p = 0.567 | r = 0.419  p = 0.046 | r = 0.134  p = 0.544 | r = -0.221  p = 0.310 | r = -0.297  p = 0.169 | r = 0.354  p = 0.098 | r = -0.266  p = 0.220 | r = 0.227  p = 0.297 | r = 0.024  p = 0.914 | r = 0.715  p = 0.425 |
| Tolerance | r = 0.208  p = 0.341 | r = 0.457 | r = -0.180  p = 0.412 | r = -0.290  p = 0.180 | r = -0.036  p = 0.871 | r = -0.070  p = 0.752 | r = 0.036  p = 0.871 | r = 0.031  p = 0.890 | r = 0.050  p = 0.821 | r = 0.020  p = 0.928 |
| Conflict | r = 0.106  p = 0.629 | r = 0.274  p = 0.206 | r = 0.324  p = 0.132 | r = -0.174  p = 0.427 | r = -0.489  p = 0.018 | r = -0.026  p = 0.905 | r = -0.397  p = 0.060 | r = -0.174  p = 0.427 | r = -0.044  p = 0.843 | r = -0.114  p = 0.605 |
| Relapse | r = 0.130  p = 0.556 | r = 0.481  p = 0.020 | r = -0.147  p = 0.504 | r = -0.406  p = 0.054 | r = 0.099  p = 0.653 | r = -0.021  p = 0.923 | r = 0.187  p = 0.393 | r = 0.226  p = 0.299 | r = -0.319  p = 0.138 | r = -0.174  p = 0.427 |

Table S4B. Correlation matrix for clustering coefficient and gaming disorder indexes (related to Figure 5).

|  | Delta-band | | Theta-band | | Alpha-band | | Beta-band | | Gamma-band | |
| --- | --- | --- | --- | --- | --- | --- | --- | --- | --- | --- |
|  | Open | Close | Open | Close | Open | Close | Open | Close | Open | Close |
| Gaming hours | r = 0.469  p = 0.024 | r = -0.057  p = 0.798 | r = -0.162  p = 0.460 | r = 0.285  p = 0.187 | r = -0.113  p = 0.607 | r = -0.008  p = 0.970 | r = -0.121  p = 0.581 | r = -0.156  p = 0.476 | r = 0.122  p = 0.578 | r = -0.182  p = 0.406 |
| IGD-20 total | r = 0.302  p = 0.161 | r = 0.574  p = 0.004 | r = 0.106  p = 0.632 | r = -0.328  p = 0.126 | r = -0.330  p = 0.124 | r = -0.072  p = 0.743 | r = -0.165  p = 0.453 | r = 0.035  p = 0.873 | r = -0.172  p = 0.434 | r = -0.093  p = 0.672 |
| Salience | r = 0.260  p = 0.230 | r = 0.170  p = 0.438 | r = 0.087  p = 0.693 | r = -0.295  p = 0.172 | r = -0.230  p = 0.292 | r = -0.046  p = 0.834 | r = -0.166  p = 0.448 | r = -0.082  p = 0.709 | r = -0.298  p = 0.167 | r = -0.293  p = 0.175 |
| Mood modification | r = 0.373  p = 0.080 | r = 0.391  p = 0.065 | r = 0.060  p = 0.785 | r = 0.091  p = 0.681 | r = -0.259  p = 0.233 | r = -0.343  p = 0.109 | r = -0.059  p = 0.788 | r = -0.031  p = 0.890 | r = 0.036  p = 0.872 | r = 0.081  p = 0.712 |
| Withdrawal symptoms | r = 0.121  p = 0.583 | r = 0.413  p = 0.050 | r = 0.157  p = 0.475 | r = -0.206  p = 0.345 | r = -0.300  p = 0.165 | r = 0.344  p = 0.108 | r = -0.266  p = 0.220 | r = 0.222  p = 0.308 | r = 0.002  p = 0.994 | r = 0.182  p = 0.406 |
| Tolerance | r = 0.162  p = 0.459 | r = 0.470  p = 0.024 | r = -0.163  p = 0.456 | r = -0.291  p = 0.177 | r = -0.035  p = 0.873 | r = -0.072  p = 0.743 | r = 0.043  p = 0.844 | r = 0.021  p = 0.925 | r = 0.062  p = 0.777 | r = 0.022  p = 0.921 |
| Conflict | r = 0.106  p = 0.629 | r = 0.271  p = 0.211 | r = 0.337  p = 0.116 | r = -0.162  p = 0.460 | r = -0.495  p = 0.016 | r = -0.021  p = 0.925 | r = -0.388  p = 0.067 | r = -0.177  p = 0.420 | r = -0.043  p = 0.846 | r = -0.093  p = 0.674 |
| Relapse | r = 0.115  p = 0.601 | r = 0.474  p = 0.022 | r = -0.138  p = 0.530 | r = -0.406  p = 0.054 | r = 0.101  p = 0.645 | r = -0.030  p = 0.891 | r = 0.206  p = 0.346 | r = 0.223  p = 0.306 | r = -0.328  p = 0.126 | r = -0.174  p = 0.427 |

Table S4C. Correlation matrix for mean path length and gaming disorder indexes (related to Figure 5).

|  | Delta-band | | Theta-band | | Alpha-band | | Beta-band | | Gamma-band | |
| --- | --- | --- | --- | --- | --- | --- | --- | --- | --- | --- |
|  | Open | Close | Open | Close | Open | Close | Open | Close | Open | Close |
| Gaming hours | r = -0.361  p = 0.091 | r = -0.196  p = 0.369 | r = 0.207  p = 0.344 | r = -0.121  p = 0.584 | r = 0.050  p = 0.821 | r = 0.054  p = 0.805 | r = 0.100  p = 0.649 | r = 0.141  p = 0.520 | r = -0.036  p = 0.872 | r = 0.257  p = 0.237 |
| IGD-20 total | r = -0.343  p = 0.109 | r = -0.541  p = 0.008 | r = -0.019  p = 0.932 | r = 0.478  p = 0.021 | r = 0.375  p = 0.078 | r = -0.162  p = 0.460 | r = 0.031  p = 0.889 | r = -0.108  p = 0.624 | r = -0.067  p = 0.760 | r = 0.125  p = 0.570 |
| Salience | r = -0.398  p = 0.060 | r = -0.131  p = 0.552 | r = -0.056  p = 0.800 | r = 0.383  p = 0.071 | r = 0.226  p = 0.299 | r = -0.116  p = 0.599 | r = 0.032  p = 0.886 | r = -0.054  p = 0.805 | r = 0.268  p = 0.216 | r = 0.325  p = 0.130 |
| Mood modification | r = -0.227  p = 0.299 | r = -0.432  p = 0.039 | r = -0.173  p = 0.429 | r = -0.023  p = 0.917 | r = 0.188  p = 0.389 | r = 0.196  p = 0.369 | r = 0.081  p = 0.712 | r = 0.060  p = 0.784 | r = -0.241  p = 0.267 | r = -0.206  p = 0.345 |
| Withdrawal symptoms | r = -0.179  p = 0.414 | r = -0.280  p = 0.196 | r = 0.041  p = 0.852 | r = 0.311  p = 0.149 | r = 0.382  p = 0.072 | r = -0.390  p = 0.065 | r = 0.140  p = 0.523 | r = -0.257  p = 0.237 | r = -0.288  p = 0.183 | r = -0.313  p = 0.146 |
| Tolerance | r = -0.208  p = 0.340 | r = -0.406  p = 0.054 | r = 0.205  p = 0.347 | r = 0.364  p = 0.088 | r = 0.099  p = 0.654 | r = -0.038  p = 0.862 | r = -0.027  p = 0.902 | r = 0.159  p = 0.470 | r = -0.143  p = 0.514 | r = -0.071  p = 0.747 |
| Conflict | r = -0.179  p = 0.415 | r = -0.244  p = 0.262 | r = -0.132  p = 0.547 | r = 0.282  p = 0.192 | r = 0.444  p = 0.034 | r = -0.111  p = 0.614 | r = 0.086  p = 0.697 | r = -0.024  p = 0.913 | r = -0.196  p = 0.370 | r = 0.247  p = 0.256 |
| Relapse | r = -0.135  p = 0.538 | r = -0.513  p = 0.012 | r = 0.130  p = 0.555 | r = 0.509  p = 0.013 | r = 0.067  p = 0.761 | r = -0.208  p = 0.340 | r = -0.162  p = 0.459 | r = -0.252  p = 0.247 | r = 0.270  p = 0.212 | r = 0.319  p = 0.138 |

Table S4D. Correlation matrix for mean global efficiency and gaming disorder indexes (related to Figure 5).

|  | Delta-band | | Theta-band | | Alpha-band | | Beta-band | | Gamma-band | |
| --- | --- | --- | --- | --- | --- | --- | --- | --- | --- | --- |
|  | Open | Close | Open | Close | Open | Close | Open | Close | Open | Close |
| Gaming hours | r = 0.260  p = 0.230 | r = 0.158  p = 0.471 | r = -0.165  p = 0.452 | r = 0.244  p = 0.262 | r = -0.068  p = 0.758 | r = -0.078  p = 0.724 | r = -0.078  p = 0.725 | r = -0.185  p = 0.398 | r = 0.041  p = 0.851 | r = -0.196  p = 0.371 |
| IGD-20 total | r = 0.349  p = 0.103 | r = 0.564  p = 0.005 | r = 0.078  p = 0.722 | r = -0.354  p = 0.098 | r = -0.336  p = 0.117 | r = -0.057  p = 0.797 | r = -0.244  p = 0.262 | r = 0.075  p = 0.733 | r = -0.140  p = 0.524 | r = -0.029  p = 0.894 |
| Salience | r = 0.258  p = 0.234 | r = 0.195  p = 0.371 | r = 0.055  p = 0.803 | r = -0.269  p = 0.215 | r = -0.208  p = 0.340 | r = -0.011  p = 0.959 | r = -0.272  p = 0.210 | r = -0.074  p = 0.739 | r = -0.308  p = 0.153 | r = -0.251  p = 0.248 |
| Mood modification | r = 0.240  p = 0.270 | r = 0.371  p = 0.081 | r = 0.117  p = 0.596 | r = 0.042  p = 0.848 | r = -0.249  p = 0.252 | r = -0.363  p = 0.089 | r = -0.011  p = 0.959 | r = 0.022  p = 0.920 | r = 0.023  p = 0.917 | r = 0.129  p = 0.556 |
| Withdrawal symptoms | r = 0.188  p = 0.391 | r = 0.429  p = 0.041 | r = 0.090  p = 0.685 | r = -0.236  p = 0.279 | r = -0.294  p = 0.173 | r = 0.367  p = 0.085 | r = -0.286  p = 0.186 | r = 0.254  p = 0.243 | r = 0.103  p = 0.640 | r = 0.251  p = 0.248 |
| Tolerance | r = 0.345  p = 0.107 | r = 0.339  p = 0.114 | r = -0.188  p = 0.391 | r = -0.278  p = 0.198 | r = -0.063  p = 0.774 | r = -0.084  p = 0.702 | r = -0.006  p = 0.979 | r = 0.043  p = 0.846 | r = 0.039  p = 0.859 | r = 0.131  p = 0.552 |
| Conflict | r = 0.156  p = 0.479 | r = 0.294  p = 0.173 | r = 0.298  p = 0.168 | r = -0.211  p = 0.334 | r = -0.492  p = 0.017 | r = -0.022  p = 0.921 | r = -0.423  p = 0.045 | r = -0.156  p = 0.479 | r = 0.018  p = 0.935 | r = -0.103  p = 0.642 |
| Relapse | r = 0.183  p = 0.402 | r = 0.487  p = 0.018 | r = -0.153  p = 0.486 | r = -0.401  p = 0.058 | r = 0.068  p = 0.756 | r = 0.003  p = 0.989 | r = 0.074  p = 0.738 | r = 0.238  p = 0.275 | r = -0.325  p = 0.131 | r = -0.151  p = 0.493 |
